# Supplementary material for: Loss of zfp36 expression in colorectal cancer correlates to wnt/ β-catenin activity and enhances epithelial-to-mesenchymal transition through upregulation of zeb1, sox9 and macc1
Source: PubMed Central journal article supplement (PMC5312301; doi:10.18632/oncotarget.10828), 2016-07-24
Supplement: oncotarget-07-59144-s001.pdf [file oncotarget-07-59144-s001.pdf]

## Loss of zfp36 expression in colorectal cancer correlates to wnt/ $\beta$ -catenin activity and enhances epithelial-to-mesenchymal transition through upregulation of zeb1, sox9 and macc1

### Supplementary Materials

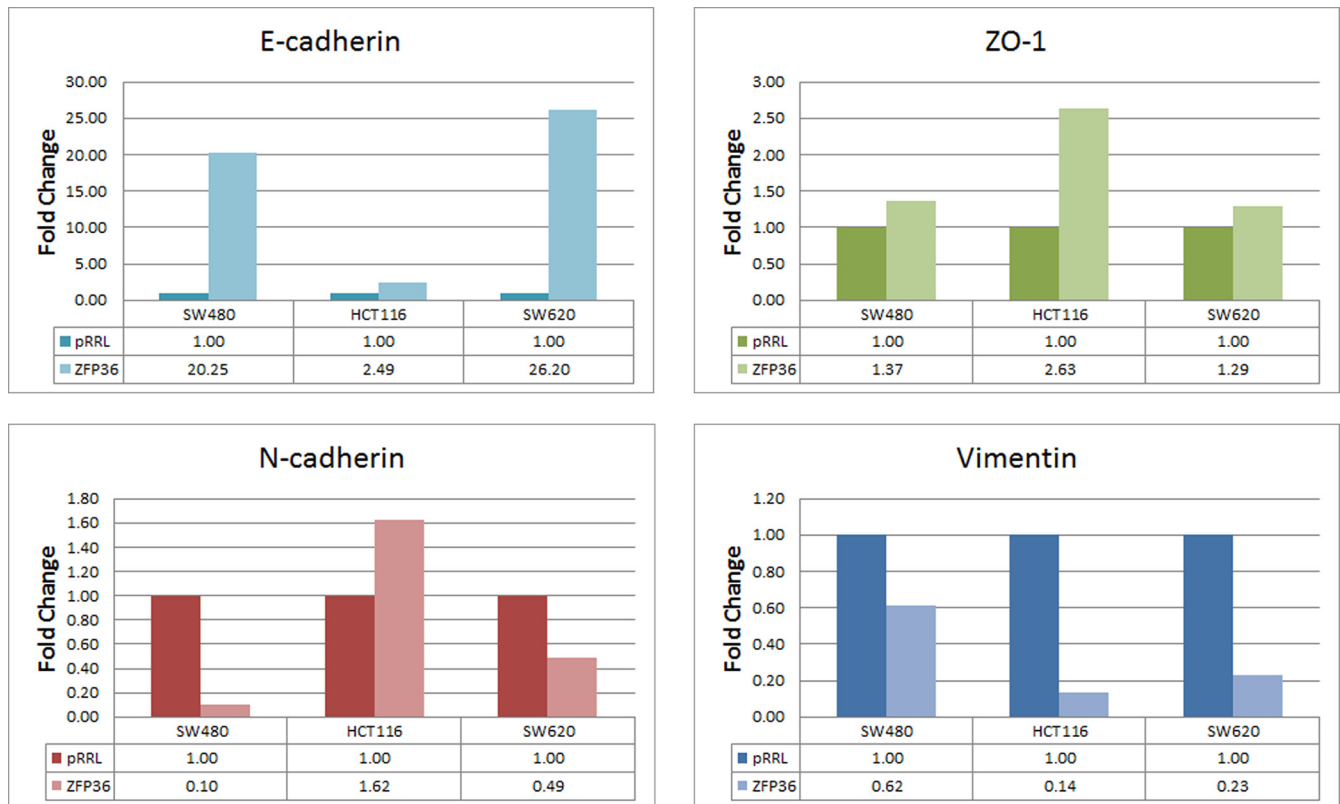

**Supplementary Figure S1:** Densitometric analysis of E-cadherin, ZO-1, N-Cadherin and Vimentin protein levels in SW480, HCT116 and SW620 infected with empty vector (pRRL) or ZFP36-overexpressing vector (ZFP36). Quantification of immuno-reactive bands intensity was carried out with ImageJ software, adjusted on Actin signals and normalized on pRRL values.

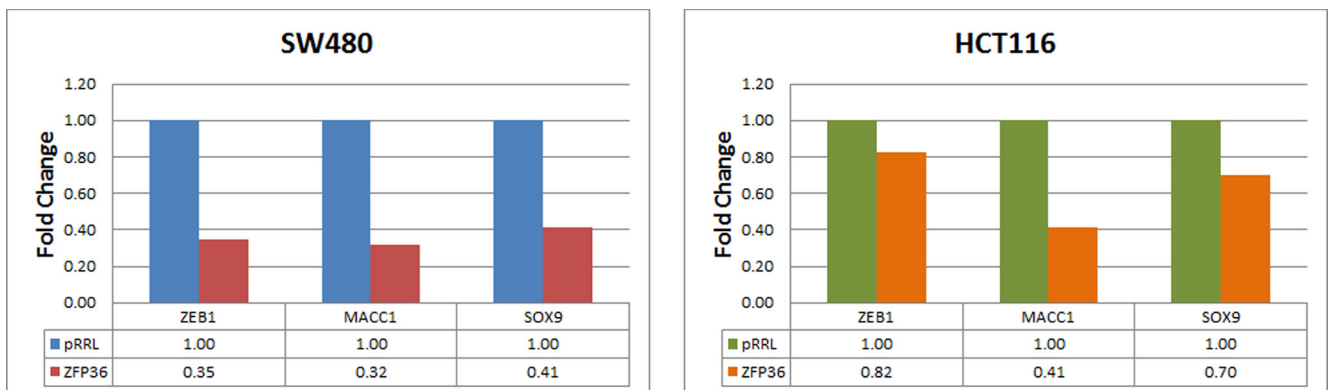

**Supplementary Figure S2:** Densitometric analysis of ZEB1, MACC1 and SOX9 protein levels in SW480 and HCT116 infected with empty vector (pRRL) or ZFP36-overexpressing vector (ZFP36). Quantification of immuno-reactive bands intensity was carried out with ImageJ software, adjusted on Actin signals and normalized on pRRL values.

### Supplementary Table S1: Descriptive features of gene expression

| Genes        | Mean   |       |       | Median |       |       | LogFC         |               |            |
|--------------|--------|-------|-------|--------|-------|-------|---------------|---------------|------------|
|              | Normal | CRC   | Mts   | Normal | CRC   | Mts   | CRC vs Normal | Mts vs Normal | Mts vs CRC |
| <b>ZFP36</b> | 8.774  | 8.304 | 8.151 | 8.722  | 8.311 | 8.190 | -0.470        | -0.623        | -0.153     |
| <b>MACC1</b> | 7.055  | 8.423 | 8.495 | 6.678  | 8.650 | 8.622 | 1.368         | 1.440         | 0.072      |
| <b>SOX9</b>  | 8.024  | 8.645 | 8.707 | 7.970  | 8.757 | 8.755 | 0.621         | 0.683         | 0.062      |
| <b>ZEB1</b>  | 7.569  | 6.888 | 6.576 | 7.413  | 6.965 | 6.488 | -0.681        | -0.993        | -0.313     |

Normal = normal mucosa, CRC = primary colorectal tumor, Mts = liver metastases, Mean = average mean, LogFC = logarithmic fold change.

### Supplementary Table S2: Results of differential expression tests

|                      | Gene  | Log FC | Aver.expr | <i>p</i> -value | Adj.pP.Val.BH |
|----------------------|-------|--------|-----------|-----------------|---------------|
| <b>CRC vs Normal</b> | ZPF36 | -0.470 | 8.388     | 1.5E-003        | 7.66E-003     |
|                      | MACC1 | 1.368  | 8.054     | 1.69E-006       | 2.17E-005     |
|                      | SOX9  | 0.621  | 0.621     | 6.10E-008       | 1.20E-006     |
|                      | ZEB1  | -0.681 | 0.979     | 3.45E-006       | 4.06E-005     |
|                      | ZPF36 | -0.623 | 8.388     | 5.69E-005       | 4.24E-004     |
| <b>Mts vs Normal</b> | MACC1 | 1.440  | 8.054     | 9.42E-007       | 1.22E-005     |
|                      | SOX9  | 0.683  | 8.487     | 8.88E-009       | 2.02E-007     |
|                      | ZEB1  | -0.993 | 6.979     | 4.15E-010       | 1.34E-008     |

LogFC = logarithmic Fold Change, Aver.expr = average expression, Adj.pP.Val.BH = adjusted *p*-value with and Benjamini Hochberg (BH) method, Normal = normal mucosa, CRC = primary tumor, Mts = liver metastases.
